# Supplementary material
Source: publisher figshare collection journal article supplement (https://acs.figshare.com/ndownloader/files/4125823)
Supplement: Supplementary file 1 [file 4125823]

**Surface-Enhanced Raman Scattering-Active Au/SiO<sub>2</sub> Nanocomposites Prepared  
by Using Sonoelectrochemical Pulse Deposition Methods**

*Chun-Chao Chang<sup>a,b,f</sup>, Kuang-Hsuan Yang<sup>d</sup>, Yu-Chuan Liu<sup>c,f\*</sup>, and Ting-Chu Hsu<sup>e</sup>,  
Fu-Der Mai<sup>c,f</sup>*

<sup>a</sup>Division of Gastroenterology and Hepatology, Department of Internal Medicine,  
Taipei Medical University Hospital, No. 250, Wu-Hsing St., Taipei 11031, Taiwan

<sup>b</sup>Department of Internal Medicine, School of Medicine, College of Medicine, Taipei  
Medical University, No. 250, Wu-Hsing St., Taipei 11031, Taiwan

<sup>c</sup>Department of Biochemistry, School of Medicine, College of Medicine, Taipei  
Medical University, No. 250, Wu-Hsing St., Taipei 11031, Taiwan

<sup>d</sup>Department of Materials Science and Engineering, Vanung University, No. 1, Van  
Nung Road, Chung-Li City, Taiwan

<sup>e</sup>General Education Center, Vanung University, No. 1, Van Nung Road, Chung-Li  
City, Taiwan

<sup>f</sup>Biomedical Mass Imaging Research Center, Taipei Medical University, No. 250,  
Wu-Hsing St., Taipei 11031, Taiwan

\* Corresponding author

Tel 886-2-27361661 ext 3155; Fax 886-2-27356689; E-mail: [liuyc@tmu.edu.tw](mailto:liuyc@tmu.edu.tw).

## Supporting Information

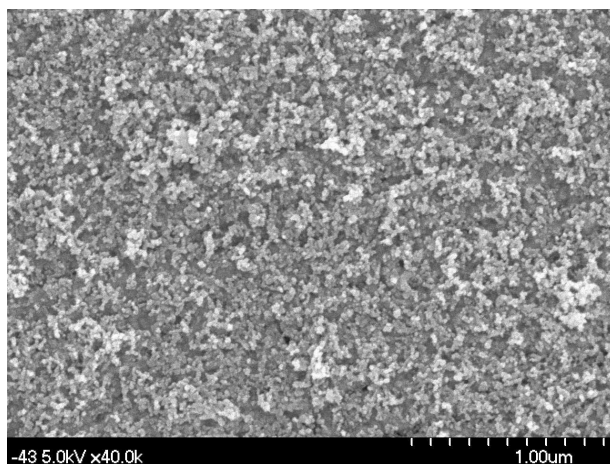

Figure S1. SEM image of SiO<sub>2</sub> NPs-deposited Pt substrate prepared in acidic solutions by using SEPD methods under a cathodic overpotential of 0.6 V and a rest overpotential of 0 V from OCP with a ratio of reaction times of pulse deposition of Au NPs to rest being 0.1; Au/SiO<sub>2</sub> NCs prepared in 0.1 M HCl containing 10 mM SiO<sub>2</sub> NPs (addition before ORCs)

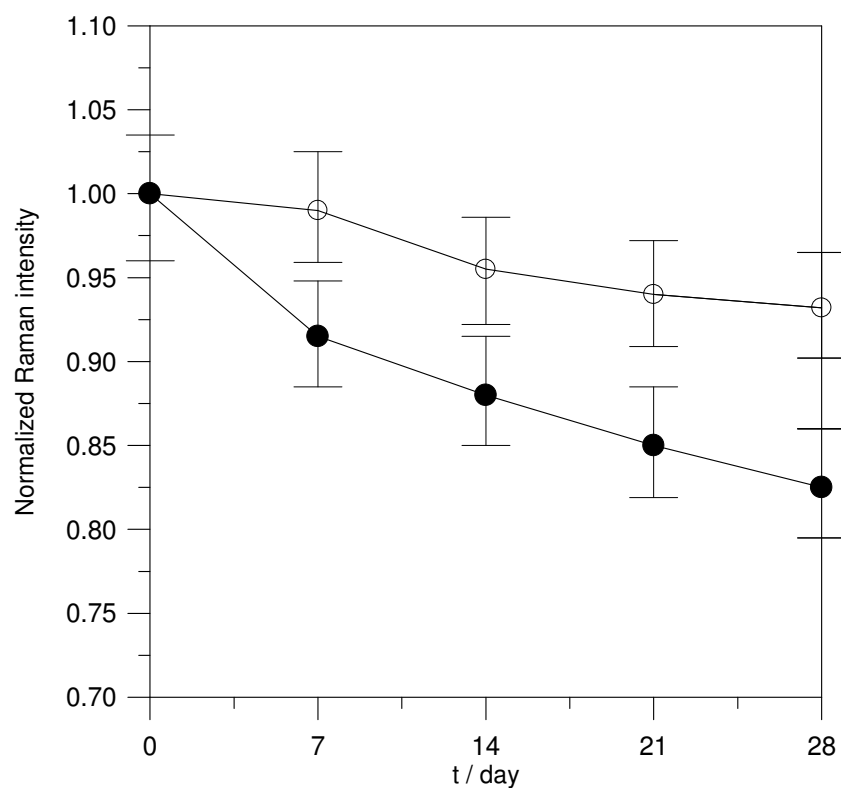

Figure S2. Variation of normalized Raman intensity of R6G adsorbed on Au/SiO<sub>2</sub> NCs-deposited and Au NPs-deposited (blank experiment) Pt substrates in 50% RH and 20% (v/v) O<sub>2</sub> at 30 °C for 4 weeks. Open and solid circles representing R6G adsorbed on Au NPs-deposited Pt substrates with and without the modification of SiO<sub>2</sub> NPs (0.1 M KCl containing 1 mM SiO<sub>2</sub> NPs before ORC in preparation), respectively.
